# Supplementary material for: Oligonucleotide-stabilized fluorescent silver nanoclusters for the specific and sensitive detection of biotin
Source: Royal Society of Chemistry journal article supplement (doi:10.1039/c5an02307f), 2015-12-17
Supplement: c5an02307f1.pdf [file c5an02307f1.pdf]

## *Supporting Information for*

### **Oligonucleotide-stabilized fluorescent silver nanoclusters for specific and sensitive detection of biotin**

Xiaoli Xiong,<sup>a</sup> Yan Tang,<sup>a</sup> Jingjin Zhao<sup>\*b</sup> and Shulin Zhao<sup>\*b</sup>

<sup>a</sup> *College of Chemistry and Materials Science, Sichuan Normal University, Chengdu, 610068, China*

<sup>b</sup> *Key Laboratory for the Chemistry and Molecular Engineering of Medicinal Resources (Ministry of Education of China), Guangxi Normal University, Guilin, 541004, China.*

### **Table of contents**

Supplementary figures and Table

|                |    |
|----------------|----|
| Figure S1----- | S2 |
| Figure S2----- | S3 |
| Figure S3----- | S4 |
| Table S1-----  | S5 |

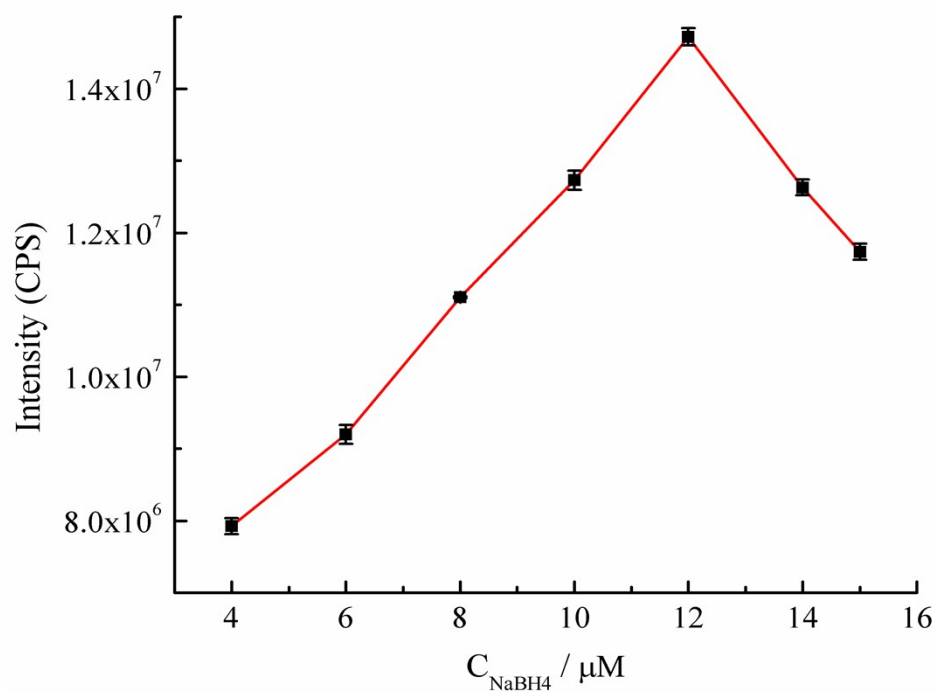

**Figure S1.** Fluorescence intensity of dT-Biotin-AgNCs under different dosages of  $\text{NaBH}_4$ . The dT-Biotin-AgNCs were prepared in 20 mM PBS (1 mM  $\text{Mg}^{2+}$ , pH 7.0) buffer. The concentrations of dT-Biotin-DNA12 and  $\text{AgNO}_3$  were 5  $\mu\text{M}$  and 30  $\mu\text{M}$ , respectively.

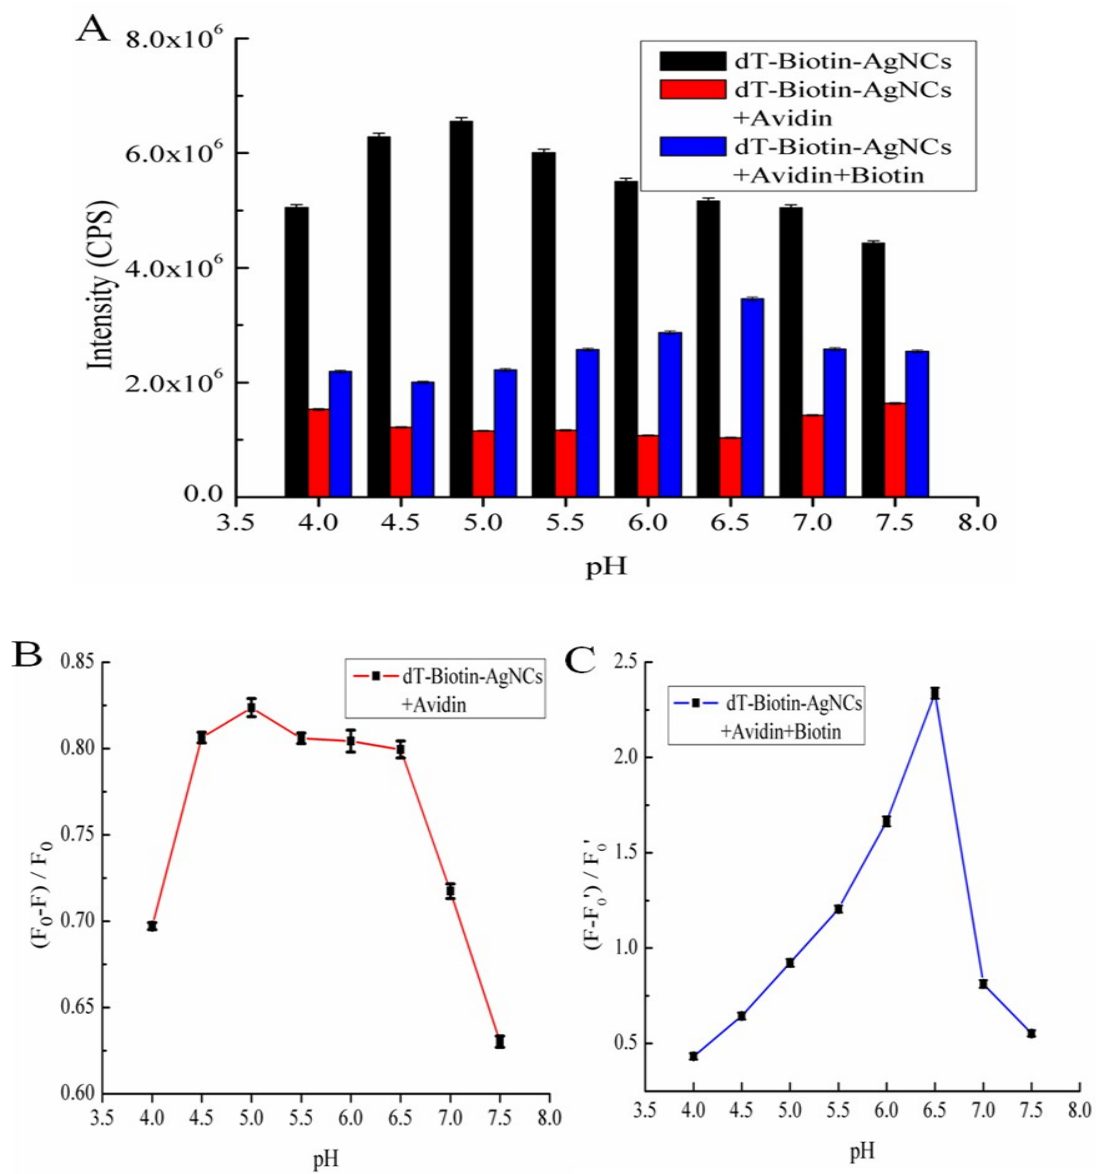

**Figure S2.** Fluorescence intensity of dT-Biotin-AgNCs in different systems (A), quenching efficiency of dT-Biotin-AgNCs by avidin (B) and the fluorescence recovery of dT-Biotin-AgNCs by biotin (C) under different pH conditions. The concentrations of dT-Biotin-AgNCs, avidin and biotin were 1  $\mu$ M, 350 nM and 1  $\mu$ M, respectively.

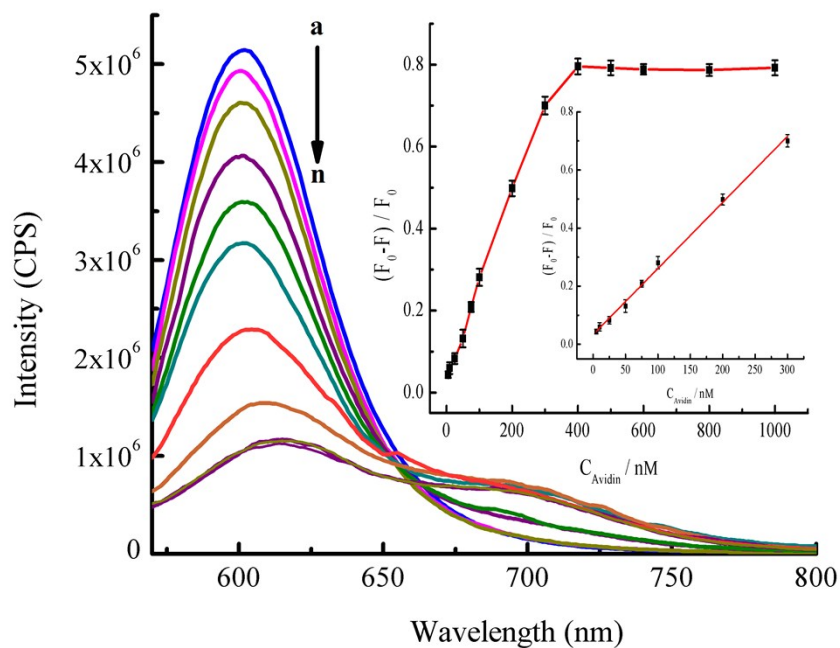

**Figure S3.** Fluorescence emission spectra of dT-Biotin-AgNCs in the presence of different concentrations of avidin. The concentrations of avidin are : (a→n) 0, 5, 10, 25, 50, 75, 100, 200, 300, 400, 500, 600, 800 and 1000 nM. The concentration of dT-Biotin-AgNCs was 1  $\mu$ M, and the reaction was carried out in 20 mM PBS (pH 6.5) at room temperature for 30 min.

**Table S1 The detection results of biotin in wheat flour**

| Sample        | Found<br>( $\mu\text{g}/100\text{ g}$ ) | Added<br>( $\mu\text{g}/100\text{ g}$ ) | Found<br>( $\mu\text{g}/100\text{ g}$ ) | Recovery<br>(%) | RSD<br>(%, n=5) |
|---------------|-----------------------------------------|-----------------------------------------|-----------------------------------------|-----------------|-----------------|
| Wheat flour-1 | 18.5                                    | 3.0                                     | 21.4                                    | 96.7            | 3.5             |
|               |                                         | 5.0                                     | 23.8                                    | 106             | 2.7             |
|               |                                         | 8.0                                     | 26.3                                    | 97.5            | 4.2             |
| Wheat flour-2 | 19.7                                    | 3.0                                     | 22.6                                    | 96.7            | 2.8             |
|               |                                         | 5.0                                     | 24.8                                    | 102             | 3.3             |
|               |                                         | 8.0                                     | 27.4                                    | 96.3            | 4.5             |
| Wheat flour-3 | 18.9                                    | 3.0                                     | 22.1                                    | 107             | 4.2             |
|               |                                         | 5.0                                     | 23.8                                    | 98.0            | 2.9             |
|               |                                         | 8.0                                     | 26.7                                    | 97.5            | 3.7             |
